# Supplementary material for: Gene expression profiling of Naïve sheep genetically resistant and susceptible to gastrointestinal nematodes
Source: PubMed Central journal article supplement (PMC1450279; doi:10.1186/1471-2164-7-42), 2006-03-06
Supplement: 1471-2164-7-42-S1.pdf [file 1471-2164-7-42-S1.pdf]

**Additional file 1: All motifs detected in the promoter regions of genes more highly expressed in susceptible animals**

| Motif (length) | E value              | Sequence Logo                                                                       | Bit score | No. of sites | TRANSFAC hit | Description                                        | Score  | P value |
|----------------|----------------------|-------------------------------------------------------------------------------------|-----------|--------------|--------------|----------------------------------------------------|--------|---------|
| 1 (12)         | $3.9 \times 10^{-6}$ | 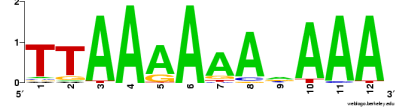   | 16.7      | 25           | BSAP         | B cell lineage specific activator                  | 3.1086 | 0.156   |
| 2 (8)          | $1.2 \times 10^{-2}$ |    | 13.3      | 50           | PPARG        | peroxisome proliferative activated receptor, gamma | 3.5056 | 0.03    |
| 3 (12)         | $2.3 \times 10^3$    |    | 18.0      | 15           | DR3          | nuclear receptor subfamily 1, group I              | 2.8787 | 0.054   |
| 4 (12)         | $1.4 \times 10^5$    |    | 17.1      | 17           | EGR          | early growth factor                                | 2.6570 | 0.121   |
| 5 (12)         | $2.0 \times 10^7$    |    | 16.7      | 17           | PAX5         | paired box gene 5                                  | 2.2633 | 0.034   |
| 6 (12)         | $2.0 \times 10^7$    |   | 17.2      | 14           | PAX5         | paired box gene 5                                  | 2.4121 | 0.053   |
| 7 (8)          | $1.4 \times 10^{11}$ |  | 14.4      | 5            | CIZ          | Cas-interacting zinc finger protein                | 1.6467 | 0.006   |
| 8 (8)          | $4.2 \times 10^{10}$ |  | 14.6      | 5            | PR           | progesterone receptor                              | 3.5862 | 0.102   |

| Motif (length) | E value              | Sequence Logo                                                                      | Bit score | No. of sites | TRANSFAC hit | Description                            | Score  | P value |
|----------------|----------------------|------------------------------------------------------------------------------------|-----------|--------------|--------------|----------------------------------------|--------|---------|
| 9 (6)          | $7.1 \times 10^{11}$ |   | 12.1      | 5            | OCT1         | Octamer-binding transcription factor-1 | 1.2166 | 0.00    |
| 10 (12)        | $1.3 \times 10^{11}$ |   | 18.1      | 5            | HNF1         | transcription factor 1, hepatic        | 2.0877 | 0.003   |
| 11 (6)         | $5.8 \times 10^{12}$ |   | 11.3      | 5            | PAX5         | paired box gene 5                      | 3.3418 | 0.054   |
| 12 (6)         | $7.1 \times 10^{11}$ |   | 12.1      | 5            | OCT1         | Octamer-binding transcription factor-1 | 1.0262 | 0.00    |
| 13 (6)         | $2.0 \times 10^{13}$ |   | 11.1      | 5            | PR           | progesterone receptor                  | 3.4683 | 0.024   |
| 14 (6)         | $7.1 \times 10^{11}$ |   | 12.1      | 5            | PR           | progesterone receptor                  | 3.6993 | 0.00    |
| 15 (11)        | $1.4 \times 10^{12}$ |  | 16.5      | 5            | MEF2         | myocyte enhancer factor 2              | 1.7762 | 0.06    |
