# Supplementary material for: Gene expression profiling of Naïve sheep genetically resistant and susceptible to gastrointestinal nematodes
Source: PubMed Central journal article supplement (PMC1450279; doi:10.1186/1471-2164-7-42), 2006-03-06
Supplement: 1471-2164-7-42-S2.pdf [file 1471-2164-7-42-S2.pdf]

**Additional file 2: All motifs detected in the promoter regions of genes more highly expressed in resistant animals**

| Motif (length) | E value               | Logo                                                                                | Bit score | No. of sites | TRANSFAC hit | Description                           | Score  | P value |
|----------------|-----------------------|-------------------------------------------------------------------------------------|-----------|--------------|--------------|---------------------------------------|--------|---------|
| 1 (12)         | 4.7                   | 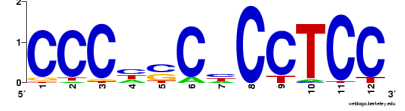   | 15.1      | 27           | SRF          | serum response element                | 2.0915 | 0.063   |
| 2 (11)         | 7.3 x 10 <sup>5</sup> |    | 16.8      | 11           | PAX5         | paired box gene 5                     | 3.3317 | 0.007   |
| 3 (12)         | 2.4 x 10 <sup>5</sup> |    | 19.4      | 8            | HFH4         | forkhead box J1                       | 1.6232 | 0.009   |
| 4 (11)         | 6.1 x 10 <sup>5</sup> |    | 19.4      | 6            | PAX5         | paired box gene 5                     | 3.1281 | 0.009   |
| 5 (11)         | 4.9 x 10 <sup>6</sup> |    | 15.5      | 17           | EGR          | early growth factor                   | 2.1310 | 0.000   |
| 6 (10)         | 2.7 x 10 <sup>6</sup> |   | 13.1      | 36           | SP1          | Sp1 transcription factor              | 0.6101 | 0.038   |
| 7 (12)         | 3.3 x 10 <sup>6</sup> |  | 18.4      | 9            | IRF          | muscle specific ring finger protein 1 | 2.4637 | 0.155   |
| 8 (12)         | 3.3 x 10 <sup>6</sup> |  | 19.7      | 7            | PAX9         | paired box gene 9                     | 2.7644 | 0.04    |

| Motif (length) | E value              | Logo                                                                               | Bit score | No. of sites | TRANSFAC hit | Description                                         | Score  | P value |
|----------------|----------------------|------------------------------------------------------------------------------------|-----------|--------------|--------------|-----------------------------------------------------|--------|---------|
| 9 (12)         | $1.3 \times 10^9$    |   | 18.7      | 7            | HOX13        | homeo box B13                                       | 3.2295 | 0.048   |
| 10 (12)        | $3.4 \times 10^{10}$ |   | 17.1      | 5            | STAT5A       | signal transducer and activator of transcription 5A | 2.1485 | 0.001   |
| 11 (6)         | $1.3 \times 10^{13}$ |   | 11.1      | 5            | CAAT         | CCAAT box                                           | 3.0462 | 0.214   |
| 12 (6)         | $1.6 \times 10^{11}$ |   | 12.1      | 5            | CAAT         | CCAAT box                                           | 3.0722 | 0.069   |
| 13 (8)         | $1.9 \times 10^{13}$ |   | 13.0      | 5            | HNF4         | transcription factor 1, hepatic                     | 2.3839 | 0.226   |
| 14 (6)         | $3.4 \times 10^{11}$ |   | 12.0      | 5            | TAACC        | TATA box                                            | 2.2700 | 0.120   |
| 15 (8)         | $2.8 \times 10^{14}$ |  | 11.2      | 5            | HNF4ALPHA    | hepatocyte nuclear factor 4, alpha                  | 1.6697 | 0.098   |
